# Supplementary material for: Maternal cannabis use in pregnancy and child neurodevelopmental outcomes
Source: Springer Nature journal article supplement (doi:10.1038/s41591-020-1002-5), 2020-08-10
Supplement: 41591_2020_1002_MOESM1_ESM.pdf [file 41591_2020_1002_MOESM1_ESM.pdf]

In the format provided by the authors and unedited.

# Maternal cannabis use in pregnancy and child neurodevelopmental outcomes

**Daniel J. Corsi**<sup>1,2,3</sup>✉, **Jessy Donelle**<sup>4</sup>, **Ewa Sucha**<sup>4</sup>, **Steven Hawken**<sup>1,3</sup>, **Helen Hsu**<sup>5</sup>, **Darine El-Chaâr**<sup>1,6</sup>, **Lise Bisnaire**<sup>7</sup>, **Deshayne Fell**<sup>2,3</sup>, **Shi Wu Wen**<sup>1,3,6</sup> and **Mark Walker**<sup>1,6</sup>

---

<sup>1</sup>Ottawa Hospital Research Institute, Ottawa, Ontario, Canada. <sup>2</sup>CHEO Research Institute, Ottawa, Ontario, Canada. <sup>3</sup>School of Epidemiology and Public Health, University of Ottawa, Ottawa, Ontario, Canada. <sup>4</sup>ICES uOttawa, Ottawa Hospital Research Institute, Ottawa, Ontario, Canada. <sup>5</sup>Department of Family Medicine, University of Ottawa, Ottawa, Ontario, Canada. <sup>6</sup>Department of Obstetrics and Gynecology, University of Ottawa, Ottawa, Ontario, Canada. <sup>7</sup>BORN Ontario, CHEO, Ottawa, Ontario, Canada. ✉e-mail: [dcorsi@ohri.ca](mailto:dcorsi@ohri.ca)

## SUPPLEMENTARY INFORMATION

Corsi, DJ et al. "Maternal cannabis use in pregnancy and child neurodevelopmental outcomes."

### Supplementary Tables

**Table S1** Birth cohort and analytical cohort creation, flow of participants and exclusions, BORN Ontario 2007-2012

| Step | N              | Description                                                                         | Number excluded  |
|------|----------------|-------------------------------------------------------------------------------------|------------------|
| 1    | 689,071        | All births in BORN between 01APR07 and 31MAR12                                      | Before Exclusion |
| 2    | 668,218        | Invalid/missing infant IKNs                                                         | 20,853           |
| 3    | 654,839        | Invalid/missing mother IKNs                                                         | 13,379           |
| 4    | 653,243        | Linkage warnings/errors                                                             | 1,596            |
| 5    | 652,389        | Mismatched/missing RPDB and BORN birthdates (infants)                               | 854              |
| 6    | 632,104        | Mismatched/missing RPDB and BORN birthdates (mothers)                               | 20,285           |
| 7    | 631,446        | Non-Ontario resident at birth                                                       | 658              |
| 8    | 631,393        | Missing gestational age information                                                 | 53               |
| 9    | 631,238        | Stillbirths                                                                         | 155              |
| 10   | 608,765        | Multifetal pregnancies                                                              | 22,473           |
| 11   | 608,713        | Mothers $\geq 50$ years of age at time of delivery                                  | 52               |
| 12   | 599,164        | Infant not OHIP eligible at birth                                                   | 9,549            |
| 13   | 538,220        | Mother not continuously OHIP eligible during pregnancy/two years prior to pregnancy | 60,944           |
| 14   | 508,025        | Missing cannabis exposure information                                               | 30,195           |
|      | <b>508,025</b> | <b>Final birth cohort</b>                                                           |                  |
| 15   | 503,065        | Died prior to or at 18 months of age/Not OHIP eligible on date                      | 4,960            |
|      | <b>503,065</b> | <b>Final analysis cohort - primary outcome (autism spectrum disorder)</b>           |                  |
| 16   | 492,861        | Died prior to or at 4 years of age/Not OHIP eligible on date                        | 10,204           |
|      | <b>492,861</b> | <b>Final analysis cohort - secondary neurodevelopmental health outcomes</b>         |                  |

**Table S2** Comparison between excluded participants and the study population across selected covariates, BORN Ontario 2007-2012

|                                      | <b>Included (N=503,065)</b>              | <b>Excluded (N=186,006)</b>              |            |
|--------------------------------------|------------------------------------------|------------------------------------------|------------|
|                                      | <b>N (%) or Mean <math>\pm</math> SD</b> | <b>N (%) or Mean <math>\pm</math> SD</b> | <b>SMD</b> |
| Maternal age, years mean (SD)        | 30.09 $\pm$ 5.57                         | 29.91 $\pm$ 5.64                         | 0.03       |
| Maternal age (categories)            |                                          |                                          |            |
| <20                                  | 18847 (3.7)                              | 4156 (2.2)                               | 0.09       |
| 20-24                                | 64134 (12.7)                             | 21025 (11.3)                             | 0.04       |
| 25-29                                | 137657 (27.4)                            | 45455 (24.4)                             | 0.07       |
| 30-34                                | 172202 (34.2)                            | 49810 (26.8)                             | 0.16       |
| 35+                                  | 110225 (21.9)                            | 31420 (16.9)                             | 0.13       |
| Post-secondary education, mean (SD)* | 0.51 $\pm$ 0.13                          | 0.52 $\pm$ 0.13                          | 0.04       |
| Income quintile                      |                                          |                                          |            |
| 1 (lowest)                           | 106439 (21.2)                            | 39868 (21.4)                             | 0.01       |
| 2                                    | 99185 (19.7)                             | 31137 (16.7)                             | 0.08       |
| 3                                    | 103461 (20.6)                            | 29125 (15.7)                             | 0.13       |
| 4                                    | 107770 (21.4)                            | 28729 (15.4)                             | 0.15       |
| 5 (highest)                          | 83712 (16.6)                             | 21694 (11.7)                             | 0.14       |
| Missing                              | 2498 (0.5)                               | 35453 (19.1)                             | 0.66       |
| Pre-existing maternal conditions     |                                          |                                          |            |
| Diabetes                             | 10656 (2.1)                              | 2344 (1.3)                               | 0.07       |
| Hypertension                         | 13931 (2.8)                              | 2909 (1.6)                               | 0.08       |
| Asthma                               | 23364 (4.6)                              | 3814 (2.1)                               | 0.14       |
| Heart disease                        | 2715 (0.5)                               | 480 (0.3)                                | 0.04       |
| Obstetric complications              |                                          |                                          |            |
| Placental abruption                  | 2722 (0.5)                               | 898 (0.5)                                | 0.01       |
| Placenta previa                      | 3211 (0.6)                               | 908 (0.5)                                | 0.02       |
| Preeclampsia                         | 9602 (1.9)                               | 3192 (1.7)                               | 0.01       |
| Eclampsia                            | 179 (<0.1)                               | 100 (0.1)                                | 0.01       |
| Gestational diabetes                 | 23735 (4.7)                              | 7058 (3.8)                               | 0.05       |
| Gestational hypertension             | 17403 (3.5)                              | 4547 (2.4)                               | 0.06       |
| Maternal psychiatric disorders       |                                          |                                          |            |
| Mood/anxiety disorders               | 136667 (27.2)                            | 28904 (15.5)                             | 0.29       |
| Substance use disorder               | 8272 (1.6)                               | 1430 (0.8)                               | 0.08       |
| Maternal substance use history       |                                          |                                          |            |
| Alcohol                              | 576 (0.1)                                | 135 (0.1)                                | 0.01       |
| Cocaine                              | 1115 (0.2)                               | 330 (0.2)                                | 0.01       |
| Hallucinogens                        | 137 (<0.1)                               | 15 (<0.1)                                | 0.01       |
| Methadone                            | 1227 (0.2)                               | 223 (0.1)                                | 0.03       |

|                         |               |               |      |
|-------------------------|---------------|---------------|------|
| Opioids                 | 646 (0.1)     | 130 (0.1)     | 0.02 |
| Prescription medication | 15170 (3.0)   | 2790 (1.5)    | 0.10 |
| Cannabis                | 3148 (0.6)    | 540 (0.3)     | 0.05 |
| Rurality                |               |               |      |
| Rural                   | 50087 (10.0)  | 14333 (7.7)   | 0.08 |
| Urban                   | 452941 (90.0) | 137045 (73.7) | 0.43 |
| missing                 | 37 (<0.1)     | 34628 (18.6)  | 0.68 |
| Parity                  |               |               |      |
| Nulliparous             | 214041 (42.5) | 73746 (39.6)  | 0.06 |
| Primiparous             | 181235 (36.0) | 51560 (27.7)  | 0.18 |
| Multiparous             | 104649 (20.8) | 29859 (16.1)  | 0.12 |
| Missing                 | 3140 (0.6)    | 30841 (16.6)  | 0.59 |
| Prenatal care provider  |               |               |      |
| Yes                     | 483080 (96.0) | 139027 (74.7) | 0.63 |
| No                      | 3006 (0.6)    | 1184 (0.6)    | 0.00 |
| Missing                 | 16979 (3.4)   | 45795 (24.6)  | 0.64 |
| Maternal smoking        |               |               |      |
| Yes                     | 60841 (12.1)  | 12230 (6.6)   | 0.19 |
| No                      | 418443 (83.2) | 124405 (66.9) | 0.38 |
| Missing                 | 23781 (4.7)   | 49371 (26.5)  | 0.63 |

**Table S3** Frequency and proportion of study population excluded or lost to follow-up by child's year of birth

| Year of birth | Included |      | Excluded/Lost to follow-up* |      |
|---------------|----------|------|-----------------------------|------|
|               | n        | %    | n                           | %    |
| 2007          | 70,815   | 69.0 | 31,820                      | 31.0 |
| 2008          | 99,702   | 72.0 | 38,859                      | 28.0 |
| 2009          | 98,624   | 71.1 | 40,095                      | 28.9 |
| 2010          | 104,712  | 76.1 | 32,898                      | 23.9 |
| 2011          | 104,001  | 75.3 | 34,057                      | 24.7 |
| 2012          | 25,211   | 75.3 | 8,277                       | 24.7 |

\*See table S2 for reasons for exclusions and losses to follow-up

**Table S4** Characteristics of reported cannabis users and nonusers in the study cohort and matched cohort, 4 year cohort, Ontario 2007-2012

| Characteristic                     | Cohort by maternal cannabis use |                  |      | CEM cohort by maternal cannabis use |                  |         |
|------------------------------------|---------------------------------|------------------|------|-------------------------------------|------------------|---------|
|                                    | Nonusers<br>N=494,783           | Users<br>N=3,038 | SMD  | Nonusers<br>N=167,985               | Users<br>N=2,286 | SMD     |
|                                    | n (%) or Mean $\pm$ SD          |                  |      | % or Mean $\pm$ SD                  |                  |         |
| Maternal age, mean $\pm$ SD        | 30.2 $\pm$ 5.5                  | 23.7 $\pm$ 5.6   | 1.17 | 23.5 $\pm$ 5.4                      | 23.4 $\pm$ 5.5   | 0.03    |
| Maternal age (categories)          |                                 |                  |      |                                     |                  |         |
| <20                                | 17,551 (3.5)                    | 795 (26.2)       | 0.67 | 27.6                                | 27.6             | <0.0001 |
| 20-24                              | 61,753 (12.5)                   | 1,111 (36.6)     | 0.58 | 37.8                                | 37.8             | <0.0001 |
| 25-29                              | 135,519 (27.4)                  | 675 (22.2)       | 0.12 | 20.8                                | 20.8             | <0.0001 |
| 30-34                              | 170,607 (34.5)                  | 297 (9.8)        | 0.62 | 9.2                                 | 9.2              | <0.0001 |
| 35+                                | 109,353 (22.1)                  | 160 (5.3)        | 0.51 | 4.6                                 | 4.6              | <0.0001 |
| Maternal education, mean $\pm$ SD* | 0.51 $\pm$ 0.1                  | 0.43 $\pm$ 0.1   | 0.63 | 0.43 $\pm$ 0.1                      | 0.43 $\pm$ 0.1   | <0.0001 |
| Maternal education (quartiles)*    |                                 |                  |      |                                     |                  |         |
| 1 (lowest)                         | 116,781 (23.6)                  | 1,374 (45.2)     | 0.47 | 47.6                                | 47.6             | <0.0001 |
| 2                                  | 128,297 (25.9)                  | 843 (27.7)       | 0.04 | 27.4                                | 27.4             | <0.0001 |
| 3                                  | 15,622 (3.2)                    | 66 (2.2)         | 0.06 | 1.7                                 | 1.7              | <0.0001 |
| 4 (highest)                        | 230,159 (46.5)                  | 686 (22.6)       | 0.52 | 21.9                                | 21.8             | <0.01   |
| Missing                            | 3,924 (0.8)                     | 69 (2.3)         | 0.12 | 1.4                                 | 1.5              | 0.01    |
| Pre-existing maternal conditions   |                                 |                  |      |                                     |                  |         |
| Diabetes                           | 10,474 (2.1)                    | 49 (1.6)         | 0.04 | 0.8                                 | 0.8              | <0.0001 |
| Hypertension                       | 13,833 (2.8)                    | 26 (0.9)         | 0.15 | 0.6                                 | 0.6              | <0.0001 |
| Asthma                             | 22,688 (4.6)                    | 385 (12.7)       | 0.29 | 10.8                                | 10.8             | <0.0001 |
| Heart disease                      | 2,673 (0.5)                     | 22 (0.7)         | 0.02 | 0.4                                 | 0.4              | <0.0001 |
| Maternal psychiatric disorders     |                                 |                  |      |                                     |                  |         |
| Mood/anxiety disorders             | 133,630 (27.0)                  | 1,342 (44.2)     | 0.36 | 40.9                                | 40.9             | <0.0001 |
| Substance use disorder             | 7,404 (1.5)                     | 546 (18.0)       | 0.58 | 11.1                                | 11.1             | <0.0001 |
| Maternal substance use history     |                                 |                  |      |                                     |                  |         |
| Alcohol                            | 414 (0.1)                       | 113 (3.7)        | 0.27 | 0.8                                 | 0.8              | <0.0001 |
| Cocaine                            | 584 (0.1)                       | 393 (12.9)       | 0.54 | 2.9                                 | 2.9              | <0.0001 |
| Hallucinogens                      | 51 (0.0)                        | 73 (2.4)         | 0.22 |                                     |                  | <0.0001 |
| Methadone                          | 1,038 (0.2)                     | 136 (4.5)        | 0.28 | 1.5                                 | 1.5              | <0.0001 |
| Opioids                            | 459 (0.1)                       | 151 (5.0)        | 0.31 | 0.6                                 | 0.6              | <0.0001 |
| Prescription medication            | 14,635 (3.0)                    | 344 (11.3)       | 0.33 | 7.1                                 | 7.1              | <0.0001 |
| Rurality                           |                                 |                  | 0.25 |                                     |                  | <0.0001 |
| Urban                              | 445,630 (90.1)                  | 2,476 (81.5)     |      | 83.9                                | 83.9             |         |
| Rural                              | 49,118 (9.9)                    | 561 (18.5)       |      | 16.1                                | 16.1             |         |

|                                       |                |              |      |      |      |         |  |
|---------------------------------------|----------------|--------------|------|------|------|---------|--|
| Income quintile                       |                |              |      |      |      |         |  |
| 1 (lowest)                            | 103,173 (20.9) | 1,339 (44.1) | 0.51 | 45.8 | 45.8 | <0.0001 |  |
| 2                                     | 97,330 (19.7)  | 691 (22.7)   | 0.08 | 23.1 | 23.1 | <0.0001 |  |
| 3                                     | 102,207 (20.7) | 404 (13.3)   | 0.20 | 13.0 | 13.0 | <0.0001 |  |
| 4                                     | 106,808 (21.6) | 329 (10.8)   | 0.30 | 10.2 | 10.2 | <0.0001 |  |
| 5 (highest)                           | 82,855 (16.7)  | 223 (7.3)    | 0.29 | 6.7  | 6.7  | <0.0001 |  |
| <i>Missing</i>                        | 2,410 (0.5)    | 52 (1.7)     | 0.12 | 1.2  | 1.2  | <0.0001 |  |
| Parity                                |                |              |      |      |      |         |  |
| Nulliparous                           | 209,972 (42.4) | 1,772 (58.3) | 0.32 | 62.3 | 62.3 | <0.0001 |  |
| Primiparous                           | 179,063 (36.2) | 668 (22.0)   | 0.32 | 21.1 | 21.1 | <0.0001 |  |
| Multiparous                           | 102,658 (20.7) | 588 (19.4)   | 0.03 | 16.3 | 16.3 | <0.01   |  |
| <i>Missing</i>                        | 3,090 (0.6)    | 10 (0.3)     | 0.04 | 0.3  | 0.3  | 0.01    |  |
| Prenatal care provider                |                |              |      |      |      |         |  |
| No                                    | 2,799 (0.6)    | 85 (2.8)     | 0.17 | 0.9  | 0.9  | <0.0001 |  |
| Yes                                   | 475,326 (96.1) | 2,856 (94.0) | 0.09 | 97.4 | 97.4 | <0.0001 |  |
| <i>Missing</i>                        | 16,658 (3.4)   | 97 (3.2)     | 0.01 | 1.8  | 1.8  | <0.0001 |  |
| Maternal smoking                      |                |              |      |      |      |         |  |
| No                                    | 414,212 (83.7) | 570 (18.8)   | 1.71 | 75.8 | 75.8 | <0.0001 |  |
| Yes                                   | 57,233 (11.6)  | 2,364 (77.8) | 1.79 | 2.7  | 2.7  | <0.0001 |  |
| <i>Missing</i>                        | 23,338 (4.7)   | 104 (3.4)    | 0.07 | 21.5 | 21.5 | <0.0001 |  |
| <i>Variables not used in matching</i> |                |              |      |      |      |         |  |
| Gestational age at delivery           |                |              | 0.21 |      |      | 0.11    |  |
| < 37 weeks                            | 29,985 (6.1)   | 370 (12.2)   |      | 7.8  | 11.1 |         |  |
| 37 weeks and more                     | 464,798 (93.9) | 2,668 (87.8) |      | 92.2 | 88.9 |         |  |
| Obstetric complications               |                |              |      |      |      |         |  |
| Placental abruption                   | 2,594 (0.5)    | 39 (1.3)     | 0.08 | 0.8  | 1.3  | 0.06    |  |
| Placenta previa                       | 3,171 (0.6)    | 15 (0.5)     | 0.02 | 0.4  | 0.4  | 0.00    |  |
| Pre-eclampsia                         | 9,428 (1.9)    | 61 (2.0)     | 0.01 | 1.9  | 2.1  | 0.01    |  |
| Eclampsia                             | 169 (0.0)      | <=5 (0.1)    | 0.01 | 0.1  | 0.0  | 0.00    |  |
| Gestational diabetes                  | 23,459 (4.7)   | 80 (2.6)     | 0.11 | 2.8  | 2.5  | 0.01    |  |
| Gestational hypertension              | 17,177 (3.5)   | 100 (3.3)    | 0.01 | 3.8  | 3.0  | 0.04    |  |

\*Measured using Census data as the neighborhood proportion of people with a post-secondary education degree

Percentages rounded to the nearest decimal place

CEM, coarsened exact matching

Area-level median family income quintiles were extracted from the Canadian Census using patient postal codes mapped to standard geographical units for census tracts and dissemination areas. Substance use was captured as ‘yes, use of substance’ or ‘no’ for the current pregnancy. Gestational age was estimated by first-trimester ultrasound or menstrual dating.

**Table S5** Hazard ratios and 95% confidence intervals for the association between prenatal cannabis exposure and secondary outcomes in children with preterm birth before 37 weeks' completed gestation

| Outcomes                                               | Crude HR (95% CI) | Adjusted HR (95% CI) <sup>b</sup> | Additionally adjusted HR (95% CI) <sup>b,c</sup> |
|--------------------------------------------------------|-------------------|-----------------------------------|--------------------------------------------------|
| Secondary outcomes <sup>a</sup>                        |                   |                                   |                                                  |
| Intellectual disability and learning disorders         | 1.22 (0.73-2.03)  | 1.08 (0.58-2.03)                  | 1.12 (0.60-2.10)                                 |
| Attention deficit hyperactivity, and conduct disorders | 2.20 (1.67-2.88)  | 0.98 (0.67-1.42)                  | 0.98 (0.67-1.42)                                 |

<sup>a</sup>Diagnosed after age 4, n=30,355 children

<sup>b</sup>Models adjusted using CEM method, n=9,820 children

<sup>c</sup>Adjusted for Placental abruption, placenta previa, pre-eclampsia, eclampsia, gestational diabetes, gestational hypertension, and preterm birth

**Table S6** Hazard ratios and 95% confidence intervals for the association between prenatal cannabis exposure and study outcomes in the overall birth cohort, including diagnoses since birth

| Outcomes                                               | Crude HR (95% CI) | Adjusted HR (95% CI) <sup>c</sup> | Additionally adjusted HR (95% CI) <sup>c,d</sup> |
|--------------------------------------------------------|-------------------|-----------------------------------|--------------------------------------------------|
| <b>Primary outcome</b>                                 |                   |                                   |                                                  |
| Autism spectrum disorder <sup>a</sup>                  | 1.62 (1.28-2.05)  | 1.52 (1.17-1.97)                  | 1.51 (1.16-1.95)                                 |
| <b>Secondary outcomes<sup>b</sup></b>                  |                   |                                   |                                                  |
| Intellectual disability and learning disorders         | 2.03 (1.66-2.47)  | 1.23 (0.97-1.55)                  | 1.22 (0.97-1.54)                                 |
| Attention deficit hyperactivity, and conduct disorders | 2.60 (2.35-2.86)  | 1.11 (0.99-1.25)                  | 1.10 (0.98-1.24)                                 |

<sup>a</sup>Diagnosed since birth, n=508,025 children

<sup>b</sup>Diagnosed since birth, n=508,025 children

<sup>c</sup> Models adjusted using CEM method, n=175,700 children

<sup>d</sup> Adjusted for Placental abruption, placenta previa, pre-eclampsia, eclampsia, gestational diabetes, gestational hypertension, and preterm birth



**Table S7** Diagnostic codes used to identify primary and secondary outcomes

| <b>Outcome/condition</b>                                     | <b>ICD-10</b>                                                                                                                                       | <b>OHIP</b>        | <b>DSM-IV<br/>(OMHRS)</b>                                                       |
|--------------------------------------------------------------|-----------------------------------------------------------------------------------------------------------------------------------------------------|--------------------|---------------------------------------------------------------------------------|
| <b>Primary outcome</b>                                       |                                                                                                                                                     |                    |                                                                                 |
| Autism                                                       | F84                                                                                                                                                 | 299                |                                                                                 |
| <b>Secondary outcomes</b>                                    |                                                                                                                                                     |                    |                                                                                 |
| Intellectual/developmental disability and learning disorders | F700, F701, F708, F709, F710, F711, F717, F719, F720, F721, F728, F729, F730, F731, F738, F739, F780, F781, F788, F789, F790, F791, F798, F799, F81 | 315, 319           |                                                                                 |
| Emotional/behavioural disorders                              | F30, F31, F32, F33, F34, F38, F39                                                                                                                   | 296, 301, 311      |                                                                                 |
| Anxiety disorders                                            | F40, F41, F42, F43, F488, F489, F930                                                                                                                | 300, 309           |                                                                                 |
| Attention deficit/hyperactivity/ conduct disorders           | F90, F91, F92                                                                                                                                       | 313, 314           |                                                                                 |
| <b>Maternal psychiatric disorders</b>                        |                                                                                                                                                     |                    |                                                                                 |
| Mood/anxiety disorders                                       | F30-F34, F38, F39, F40-F42, F430, F431, F438 F439, F44, F45                                                                                         | 296, 300, 309, 311 | 296, 300, 308, 309, 311                                                         |
| Substance use disorders                                      | F10-F19, F55                                                                                                                                        | 303, 304           | 2910, 2911, 2912, 2913, 2915, 2918, 2919, 2920, 2921, 2928, 2929, 303, 304, 305 |
| <b>Exposure</b>                                              |                                                                                                                                                     |                    |                                                                                 |
| Cannabis dependence                                          | F12                                                                                                                                                 |                    | 3043, 3052                                                                      |

**Primary care “core” OHIP fee codes**

The following OHIP fee codes were used to identify primary care outpatient visits (includes additional pediatric codes):

- A001, A002, A003, A007, A261, A268, A903
- E075
- G212, G271, G372, G373, G365, G538, G539, G590, G591
- K005, K013, K017, K130, K131, K132, K267, K269
- P004
