# Supplementary material for: Maternal cannabis use in pregnancy and child neurodevelopmental outcomes
Source: Springer Nature journal article supplement (doi:10.1038/s41591-020-1002-5), 2020-08-10
Supplement: 41591_2020_1002_MOESM2_ESM.pdf [file 41591_2020_1002_MOESM2_ESM.pdf]

## Reporting Summary

Nature Research wishes to improve the reproducibility of the work that we publish. This form provides structure for consistency and transparency in reporting. For further information on Nature Research policies, see [Authors & Referees](#) and the [Editorial Policy Checklist](#).

### Statistics

For all statistical analyses, confirm that the following items are present in the figure legend, table legend, main text, or Methods section.

n/a Confirmed

- The exact sample size ( $n$ ) for each experimental group/condition, given as a discrete number and unit of measurement
- A statement on whether measurements were taken from distinct samples or whether the same sample was measured repeatedly
- The statistical test(s) used AND whether they are one- or two-sided  
*Only common tests should be described solely by name; describe more complex techniques in the Methods section.*
- A description of all covariates tested
- A description of any assumptions or corrections, such as tests of normality and adjustment for multiple comparisons
- A full description of the statistical parameters including central tendency (e.g. means) or other basic estimates (e.g. regression coefficient) AND variation (e.g. standard deviation) or associated estimates of uncertainty (e.g. confidence intervals)
- For null hypothesis testing, the test statistic (e.g.  $F$ ,  $t$ ,  $r$ ) with confidence intervals, effect sizes, degrees of freedom and  $P$  value noted  
*Give  $P$  values as exact values whenever suitable.*
- For Bayesian analysis, information on the choice of priors and Markov chain Monte Carlo settings
- For hierarchical and complex designs, identification of the appropriate level for tests and full reporting of outcomes
- Estimates of effect sizes (e.g. Cohen's  $d$ , Pearson's  $r$ ), indicating how they were calculated

*Our web collection on [statistics for biologists](#) contains articles on many of the points above.*

### Software and code

Policy information about [availability of computer code](#)

Data collection

No commercial, custom use or open source code/software was used in this manuscript

Data analysis

Statistical analyses were performed with SAS software (version 9)

For manuscripts utilizing custom algorithms or software that are central to the research but not yet described in published literature, software must be made available to editors/reviewers. We strongly encourage code deposition in a community repository (e.g. GitHub). See the Nature Research [guidelines for submitting code & software](#) for further information.

### Data

Policy information about [availability of data](#)

All manuscripts must include a [data availability statement](#). This statement should provide the following information, where applicable:

- Accession codes, unique identifiers, or web links for publicly available datasets
- A list of figures that have associated raw data
- A description of any restrictions on data availability

The dataset from this study is held securely in coded form at ICES. While data sharing agreements prohibit ICES from making the dataset publicly available, access may be granted to those who meet pre-specified criteria for confidential access, available at [www.ices.on.ca/DAS](http://www.ices.on.ca/DAS). The full dataset creation plan is available from the authors upon request.

## Field-specific reporting

Please select the one below that is the best fit for your research. If you are not sure, read the appropriate sections before making your selection.

Life sciences       Behavioural & social sciences       Ecological, evolutionary & environmental sciences

For a reference copy of the document with all sections, see [nature.com/documents/nr-reporting-summary-flat.pdf](https://www.nature.com/documents/nr-reporting-summary-flat.pdf)

## Behavioural & social sciences study design

All studies must disclose on these points even when the disclosure is negative.

|                   |                                                                                                                                                                                                                                                                                                                                                                                                                                                                                                      |
|-------------------|------------------------------------------------------------------------------------------------------------------------------------------------------------------------------------------------------------------------------------------------------------------------------------------------------------------------------------------------------------------------------------------------------------------------------------------------------------------------------------------------------|
| Study description | This is a quantitative, population-based retrospective cohort study.                                                                                                                                                                                                                                                                                                                                                                                                                                 |
| Research sample   | The study population includes singleton, live births, which occurred between April 1st, 2007 and March 31st, 2012, born to women between the ages of 16 and 50 and who were continuously eligible for Ontario health insurance in the 2 years before pregnancy. Children born to non-Ontario residents, those without a valid health card number, and those who died before the age of 18 months (4 years for secondary outcomes) were excluded from primary analyses.                               |
| Sampling strategy | The sample includes birth registry data from Ontario, Canada with nearly complete capture of every pregnancy and birth in the province.                                                                                                                                                                                                                                                                                                                                                              |
| Data collection   | This study was conducted at the Institute for Clinical Evaluative Sciences (ICES), a non-profit research organization with Prescribed Entity status under provincial privacy legislation. ICES acts as a secure repository for Ontario's perinatal database and provincial health administrative databases, with the ability to deterministically link individual patient health information across databases using unique encoded identifiers to protect privacy and confidentiality.               |
| Timing            | Singleton, live births, which occurred between April 1st, 2007 and March 31st, 2012, with follow-up of children until March 31, 2017.                                                                                                                                                                                                                                                                                                                                                                |
| Data exclusions   | We excluded mothers outside the ages of 16 to 50 years and those who did not reside in Ontario for 2 years prior to pregnancy. Children born to non-Ontario residents, those without a valid health card number, and those who died before the age of 18 months (4 years for secondary outcomes) were excluded. We excluded participants if linkage with health administration databases was incomplete. We excluded stillbirths, multi-fetal pregnancies, and infants with missing gestational age. |
| Non-participation | This study used follow-up of participants through administrative data linkages, was population-based, and involved no individual-level recruitment.                                                                                                                                                                                                                                                                                                                                                  |
| Randomization     | This is a retrospective study and randomization was not preformed.                                                                                                                                                                                                                                                                                                                                                                                                                                   |

## Reporting for specific materials, systems and methods

We require information from authors about some types of materials, experimental systems and methods used in many studies. Here, indicate whether each material, system or method listed is relevant to your study. If you are not sure if a list item applies to your research, read the appropriate section before selecting a response.

### Materials & experimental systems

| n/a                                 | Involved in the study                                           |
|-------------------------------------|-----------------------------------------------------------------|
| <input checked="" type="checkbox"/> | <input type="checkbox"/> Antibodies                             |
| <input checked="" type="checkbox"/> | <input type="checkbox"/> Eukaryotic cell lines                  |
| <input checked="" type="checkbox"/> | <input type="checkbox"/> Palaeontology                          |
| <input checked="" type="checkbox"/> | <input type="checkbox"/> Animals and other organisms            |
| <input type="checkbox"/>            | <input checked="" type="checkbox"/> Human research participants |
| <input type="checkbox"/>            | <input checked="" type="checkbox"/> Clinical data               |

### Methods

| n/a                                 | Involved in the study                           |
|-------------------------------------|-------------------------------------------------|
| <input checked="" type="checkbox"/> | <input type="checkbox"/> ChIP-seq               |
| <input checked="" type="checkbox"/> | <input type="checkbox"/> Flow cytometry         |
| <input checked="" type="checkbox"/> | <input type="checkbox"/> MRI-based neuroimaging |

## Human research participants

Policy information about [studies involving human research participants](#)

|                            |                                                                                                                                                                                                                                                                                                                                                                                                                                                                                                                                                                                                                     |
|----------------------------|---------------------------------------------------------------------------------------------------------------------------------------------------------------------------------------------------------------------------------------------------------------------------------------------------------------------------------------------------------------------------------------------------------------------------------------------------------------------------------------------------------------------------------------------------------------------------------------------------------------------|
| Population characteristics | Following exclusions, the final cohort was based on 508,025 births. Children who lost Ontario Health Insurance eligibility or died prior to 18 months (n=4,960) or 4 years (n=10,204) of age were excluded from the primary analyses of autism spectrum disorder (ASD) and secondary analyses of neurodevelopmental outcomes, yielding analytical cohorts of 503,065 and 497,821, respectively (Table B1). The mean age of mothers was 30.1 years (SD 5.6), the mean gestational age at delivery was 38.9 weeks (SD 1.7), and 51.4% of children were male. The rate of reported cannabis use in pregnancy was 0.6%. |
| Recruitment                | This study used follow-up of participants through administrative data linkages, was population-based, and involved no individual-level recruitment.                                                                                                                                                                                                                                                                                                                                                                                                                                                                 |

## Ethics oversight

Research ethics board approval for this study was obtained from the Ottawa Health Science Network Research Ethics Board and the Children's Hospital of Eastern Ontario.

Note that full information on the approval of the study protocol must also be provided in the manuscript.

## Clinical data

Policy information about [clinical studies](#)

All manuscripts should comply with the ICMJE [guidelines for publication of clinical research](#) and a completed [CONSORT checklist](#) must be included with all submissions.

|                             |                                                                                                                                                                                                                                                                                                                                                                                                                                                                                                                                                                                                                                                                                                                                                                                                                                                                                                                                                                                                                                                                                                                                                                                                                                                                                                                                                                                                                                                                                                                                                                                                                                                                                                                                                                                                                                                                  |
|-----------------------------|------------------------------------------------------------------------------------------------------------------------------------------------------------------------------------------------------------------------------------------------------------------------------------------------------------------------------------------------------------------------------------------------------------------------------------------------------------------------------------------------------------------------------------------------------------------------------------------------------------------------------------------------------------------------------------------------------------------------------------------------------------------------------------------------------------------------------------------------------------------------------------------------------------------------------------------------------------------------------------------------------------------------------------------------------------------------------------------------------------------------------------------------------------------------------------------------------------------------------------------------------------------------------------------------------------------------------------------------------------------------------------------------------------------------------------------------------------------------------------------------------------------------------------------------------------------------------------------------------------------------------------------------------------------------------------------------------------------------------------------------------------------------------------------------------------------------------------------------------------------|
| Clinical trial registration | n/a                                                                                                                                                                                                                                                                                                                                                                                                                                                                                                                                                                                                                                                                                                                                                                                                                                                                                                                                                                                                                                                                                                                                                                                                                                                                                                                                                                                                                                                                                                                                                                                                                                                                                                                                                                                                                                                              |
| Study protocol              | The full study protocol and data creation plans are available from the corresponding author.                                                                                                                                                                                                                                                                                                                                                                                                                                                                                                                                                                                                                                                                                                                                                                                                                                                                                                                                                                                                                                                                                                                                                                                                                                                                                                                                                                                                                                                                                                                                                                                                                                                                                                                                                                     |
| Data collection             | Births occurred between April 1st, 2007 and March 31st, 2012, with follow-up of children until March 31, 2017. Data were analyzed between July 2018 and December 2019                                                                                                                                                                                                                                                                                                                                                                                                                                                                                                                                                                                                                                                                                                                                                                                                                                                                                                                                                                                                                                                                                                                                                                                                                                                                                                                                                                                                                                                                                                                                                                                                                                                                                            |
| Outcomes                    | <p>All diagnoses were taken from ICES databases. We used definitions of outcomes which have been undertaken and validated in ICES studies for autism spectrum disorder, attention deficit hyperactivity and conduct disorders, and intellectual disabilities and learning disorders. As diagnoses would not typically be made in the first several years of life, we considered children at risk of for autism spectrum disorder only after 18 months of follow up, and only after 4 years for secondary outcomes. This approach has been taken in other population-based cohort studies of neuropsychiatric outcomes using follow up in health administrative registries.</p> <p>The primary outcome was autism spectrum disorder diagnosed after 18 months. Diagnoses were recorded up to March 31, 2017, when children could be a maximum of 10 years of age. We define autism spectrum disorder as at least two outpatient diagnoses by either a pediatrician or psychiatrist or at least one diagnosis in hospital databases, or both. This definition has been used previously, and has been shown to have a positive predictive value of up to 87%. Secondary neurodevelopmental outcomes included: 1) intellectual disability and learning disorders and 2) attention-deficit/hyperactivity and conduct disorders. Using methods which have been validated previously, we measured the secondary outcomes using diagnosis codes in hospital discharges from all acute care psychiatric and non-psychiatric hospitals, and comprehensive outpatient databases. The specific algorithm for determining these outcomes was at least one hospital diagnosis or two or more outpatient diagnoses from a pediatrician, psychiatrist, or physician after 4 years of age (associated diagnostic codes are presented in the supplemental appendix, Table B7).</p> |
